# Supplementary material for: Anti-KIF20B autoantibodies are associated with cranial neuropathy in systemic lupus erythematosus
Source: PubMed Central journal article supplement — Lupus Sci Med. 2024 Apr 9;11(1):e001139. doi: 10.1136/lupus-2023-001139 (PMC11015279; doi:10.1136/lupus-2023-001139), 2024-04-09

**Supplemental Figure 2: Kaplan-Meier survival curve for anti-KIF20B positivity and cranial neuropathy within all follow-up visits**

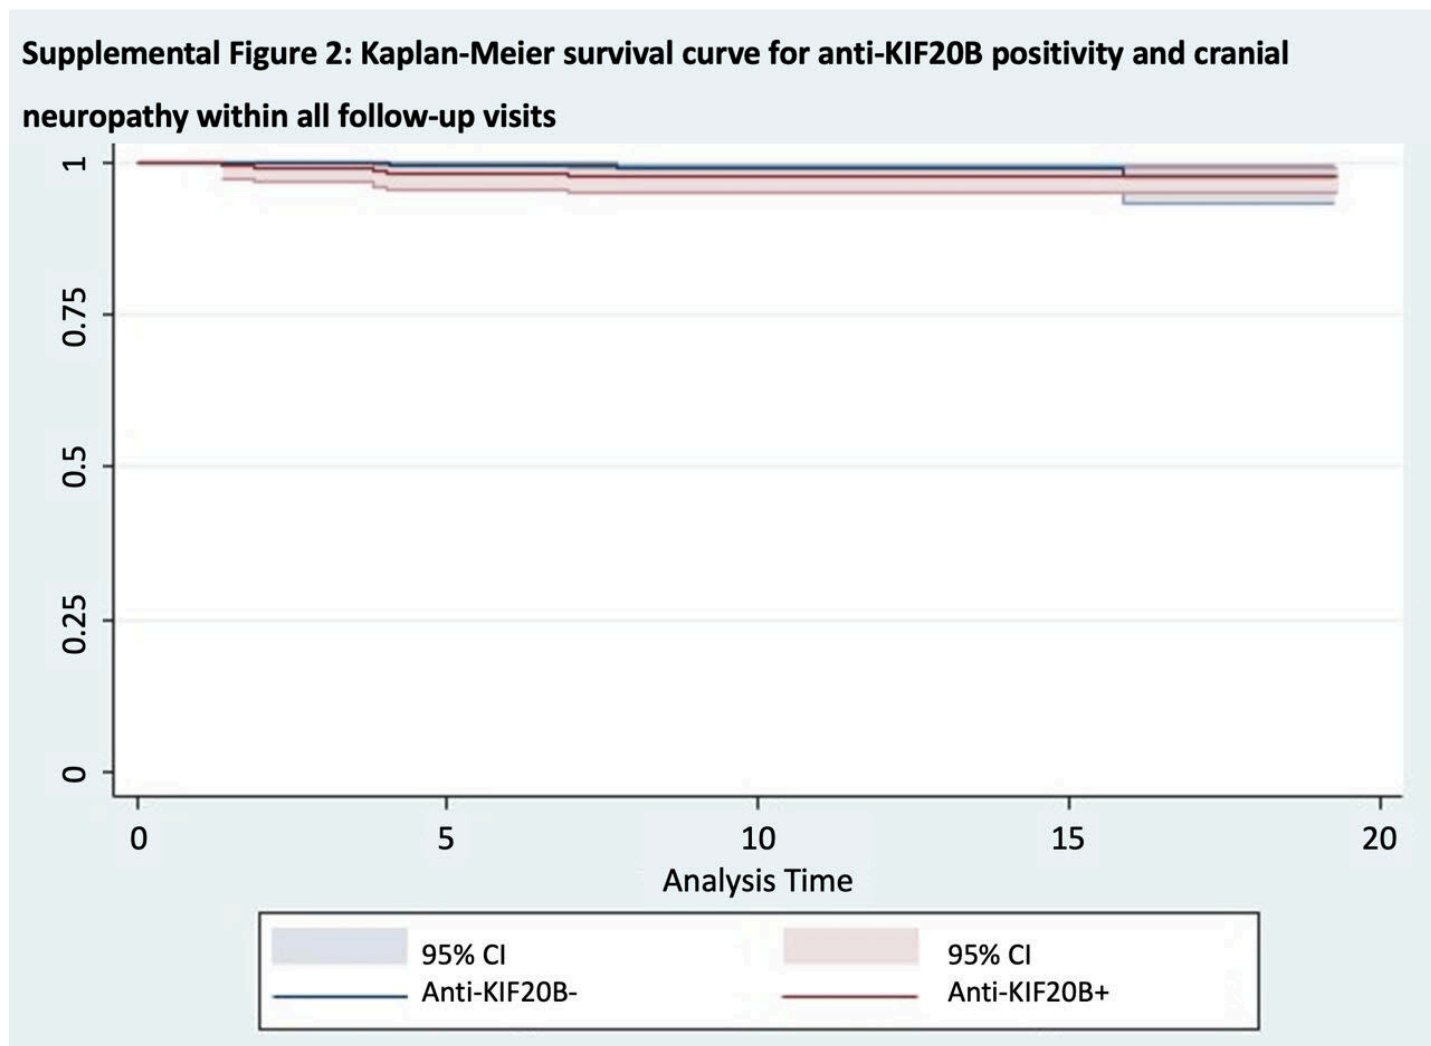

Supplement: lupus-2023-001139supp002.pdf [file lupus-2023-001139supp002.pdf]
