# Supplementary material for: Anti-KIF20B autoantibodies are associated with cranial neuropathy in systemic lupus erythematosus
Source: PubMed Central journal article supplement — Lupus Sci Med. 2024 Apr 9;11(1):e001139. doi: 10.1136/lupus-2023-001139 (PMC11015279; doi:10.1136/lupus-2023-001139), 2024-04-09
Supplement: lupus-2023-001139supp003.pdf [file lupus-2023-001139supp003.pdf]

## SUPPLEMENTAL TABLES AND FIGURES

| <b>Supplemental Table 1: SLE-related Autoantibodies performed</b> |                                                                                                                                                                                                                                                                                                                                                                                                                                                                                                                                                                                                                                         |
|-------------------------------------------------------------------|-----------------------------------------------------------------------------------------------------------------------------------------------------------------------------------------------------------------------------------------------------------------------------------------------------------------------------------------------------------------------------------------------------------------------------------------------------------------------------------------------------------------------------------------------------------------------------------------------------------------------------------------|
| <b>Autoantibody</b>                                               | <b>Assay and Cut-offs</b>                                                                                                                                                                                                                                                                                                                                                                                                                                                                                                                                                                                                               |
| Anti-dsDNA                                                        | Anti-dsDNA titers and positivity were detected by a chemiluminescence immunoassay (CLIA) (Werfen, San Diego, USA) using a cut-off of >27 chemiluminescence units (CU). Positive was >35 (CU), while 27-35 (CU) was considered indeterminate (borderline).                                                                                                                                                                                                                                                                                                                                                                               |
| Other SLE-specific autoantibodies                                 | Using a Luminex 200 flow luminometer (Luminex, Austin, USA), ALBIA (FIDIS Connective13: TheraDiag, Paris, France) was performed to analyze SLE-related analytes, which included ribosomal P, Ro52/Tripartite Motif Protein 21 (TRIM21), SSA/Ro60, SSB/La, Sm, U1-RNP, and histones. A cut-off of >40 median fluorescence units (MFU) was considered positive.                                                                                                                                                                                                                                                                           |
| Anti-phospholipid antibodies                                      | Anti-phospholipid antibodies (IgG and IgM anticardiolipin and anti- $\beta$ 2-glycoprotein-1) were measured using ELISA (Werfen, San Diego, USA). As per the revised Sapporo antiphospholipid syndrome classification criteria (1), a cut-off of >40 units for IgG/IgM anticardiolipin was considered medium to high positive while a cut-off of >20 units (>99 <sup>th</sup> percentile) was positive for IgG/IgM anti- $\beta$ 2-glycoprotein-1 (1). All autoantibodies were measured at MitogenDx except for lupus anticoagulant, which was measured at Oklahoma Medical Foundation (Oklahoma City, OK) as previously described (2). |

1. Miyakis S, Lockshin MD, Atsumi T, Branch DW, Brey RL, Cervera R, et al. International consensus statement on an update of the classification criteria for definite antiphospholipid syndrome (APS). *J Thromb Haemost*. 2006;4(2):295-306.
2. Hanly J, Urowitz M, Siannis F, Farewell V, Gordon C, Bae S, et al. Autoantibodies and neuropsychiatric events at the time of systemic lupus erythematosus diagnosis: results from an international inception cohort study. *Arthritis & Rheumatism: Official Journal of the American College of Rheumatology*. 2008;58(3):843-53.

| <b>Supplemental Table 2: Distribution of anti-KIF20B positivity at baseline between patients with and without NPSLE manifestations<sup>a</sup> within 5 years of follow-up using Attribution Model B</b> |                       |                        |                        |                |
|----------------------------------------------------------------------------------------------------------------------------------------------------------------------------------------------------------|-----------------------|------------------------|------------------------|----------------|
| <b>NPSLE Manifestations, %</b>                                                                                                                                                                           | <b>Cohort (n=795)</b> | <b>KIF20B+ (n=237)</b> | <b>KIF20B- (n=558)</b> | <b>p-value</b> |
| Headache                                                                                                                                                                                                 | 0.0%                  | 0.0%                   | 0.0%                   | -              |
| Mood Disorders                                                                                                                                                                                           | 6.4%                  | 3.8%                   | 7.5%                   | 0.050          |
| Seizures and/or Seizure Disorder                                                                                                                                                                         | 3.4%                  | 3.4%                   | 3.4%                   | 0.983          |
| Cognitive Dysfunction                                                                                                                                                                                    | 3.0%                  | 3.4%                   | 2.9%                   | 0.702          |
| Anxiety Disorder                                                                                                                                                                                         | 0.0%                  | 0.0%                   | 0.0%                   | -              |
| Cerebrovascular Disease                                                                                                                                                                                  | 4.0%                  | 3.8%                   | 4.1%                   | 0.831          |
| Acute Confusional State                                                                                                                                                                                  | 2.1%                  | 1.7%                   | 2.3%                   | 0.789          |

|                                                      |       |       |       |              |
|------------------------------------------------------|-------|-------|-------|--------------|
| Psychosis                                            | 1.3%  | 1.7%  | 1.1%  | 0.495        |
| Myelopathy                                           | 0.5%  | 0.0%  | 0.7%  | 0.324        |
| Movement Disorder                                    | 0.4%  | 0.8%  | 0.2%  | 0.213        |
| Aseptic Meningitis                                   | 0.5%  | 0.8%  | 0.4%  | 0.587        |
| Demyelinating Syndrome                               | 0.5%  | 0.0%  | 0.7%  | 0.324        |
| Polyneuropathy                                       | 1.3%  | 1.7%  | 1.1%  | 0.495        |
| <b>Mononeuropathy<sup>β</sup></b>                    | 1.6%  | 0.0%  | 2.3%  | <b>0.013</b> |
| <b>Cranial Neuropathy</b>                            | 1.3%  | 3.0%  | 0.5%  | <b>0.010</b> |
| Acute Inflammatory Demyelinating Polyneuropathy      | 0.1%  | 0.0%  | 0.2%  | 1.000        |
| Autonomic Disorder                                   | 0.3%  | 0.0%  | 0.4%  | 1.000        |
| Plexopathy                                           | 0.0%  | 0.0%  | 0.0%  | -            |
| Myasthenia Gravis                                    | 0.3%  | 0.0%  | 0.4%  | 1.000        |
| Any Central Neurologic Manifestation <sup>α</sup>    | 16.0% | 14.4% | 16.7% | 0.414        |
| Any Peripheral Neurologic Manifestation <sup>δ</sup> | 4.3%  | 4.6%  | 4.1%  | 0.741        |
| Any Neurological Manifestation                       | 19.3% | 17.7% | 19.9% | 0.478        |

Significant covariates are in **bold** (p<0.05).

p-values: Chi-squared test or Fisher's exact test.

<sup>α</sup>ACR NPSLE manifestations with onset within 10 years of SLE diagnosis and still present within the enrolment window or occurred subsequently; no 'exclusions'; not one of the NPSLE manifestations identified by Ainiola et al. (1).

<sup>β</sup>Mononeuropathy excluded from further analysis as no events observed in anti-KIF20B+ group and was non-significant in subsequent logistic regression analysis.

<sup>α</sup>Central Neurologic Manifestations: aseptic meningitis, cerebrovascular disease, cognitive dysfunction, headache, movement disorder, seizures, acute confusional state, anxiety disorder, mood disorder, psychosis, demyelinating syndrome, myelopathy.

<sup>δ</sup>Peripheral Neurologic Manifestations: autonomic disorder, mononeuropathy, cranial neuropathy, plexopathy, polyneuropathy, acute inflammatory demyelinating polyradiculoneuropathy, myasthenia gravis.

1. Ainiola H, Hietaharju A, Loukkola J, Peltola J, Korpela M, Metsänoja R, et al. Validity of the New American College of Rheumatology Criteria for Neuropsychiatric Lupus Syndromes: A Population-Based Evaluation. 2001 [cited 2023 Jan 2]; Available from: <https://onlinelibrary.wiley.com/doi/10.1002/1529-0131>

| Supplemental Table 3: Clinical and demographic characteristics for SLE patients with CN |                     |                      |                     |                         |                                                                            |                                                                                                     |
|-----------------------------------------------------------------------------------------|---------------------|----------------------|---------------------|-------------------------|----------------------------------------------------------------------------|-----------------------------------------------------------------------------------------------------|
|                                                                                         | Anti-KIF20B Testing | Age at Disease Onset | CN Affected         | SLEDAI-2K at Enrollment | Other SLE Manifestations                                                   | Other NPSLE Manifestations                                                                          |
| Patient 1                                                                               | Negative            | 42                   | Trochlear, abducens | 0                       | Serositis, arthritis, hematologic, immunologic, ANA, dsDNA, Ro60, Ro52, La | Aseptic meningitis, stroke, polyneuropathy, autonomic disorder, tension headache, migraine headache |

|            |          |    |                              |    |                                                                                                                                       |                                                                             |
|------------|----------|----|------------------------------|----|---------------------------------------------------------------------------------------------------------------------------------------|-----------------------------------------------------------------------------|
| Patient 2  | Positive | 34 | Vestibulo-cochlear           | 0  | Oral ulcers, photosensitive rash, arthritis, hematologic, immunologic, ANA positive, dsDNA, PM/Scl                                    | Mood disorder with depressive features                                      |
| Patient 3  | Positive | 19 | Facial                       | 2  | Arthritis, hematologic, immunologic, ANA, hypocomplementemic                                                                          | Tension headache, migraine headache                                         |
| Patient 4  | Positive | 45 | Abducens, glossopharyngeal   | 8  | Malar rash, arthritis, hematologic, immunologic, ANA, DSDNA, Ribosomal P                                                              | Aseptic meningitis, acute confusional state, cognitive dysfunction          |
| Patient 5  | Positive | 20 | Optic                        | 18 | Arthritis, renal, hematologic, ANA, vasculitis, hypocomplementemia, B2GP1, DSDNA, Histone, Ribosomal P, Smith, RNP, PCNA              | Migraine headache, tension headache, mood disorder with depressive features |
| Patient 6  | Negative | 54 | Abducens, vestibulo-cochlear | 4  | Arthritis, photosensitivity, Immunologic, ANA, hypocomplementemia, DSDNA, Ribosomal P, PCNA                                           |                                                                             |
| Patient 7  | Positive | 45 | Optic                        | 0  | Malar, serositis, arthritis, hematologic, immunologic, ANA, DSDNA, histone                                                            |                                                                             |
| Patient 8  | Negative | 37 | Vestibulo-cochlear           | 2  | Malar, photosensitive, hematologic, ANA, DNA binding, Ro 60                                                                           | Autonomic disorder, migraine headache                                       |
| Patient 9  | Positive | 26 | Trigeminal                   | 0  | Arthritis, hematologic, immunologic, ANA, DSDNA, Histone, Jo-1, Ribosomal P, Smith, RNP, Scl-70, PM/Scl, CENP-B, PCNA, Ro52, Ro60, La |                                                                             |
| Patient 10 | Positive | 38 | Facial                       | 2  | Malar rash, oral ulcers, renal, hematologic, immunologic, ANA, DNA binding, DSDNA, Ribosomal P                                        | Major depressive like episode, migraine headache                            |

**Supplemental Figure 1: Kaplan-Meier survival curve for anti-KIF20B positivity and cranial neuropathy within 5 years of follow-up**

**Supplemental Figure 2: Kaplan-Meier survival curve for cranial neuropathy and anti-KIF20B positivity and cranial neuropathy within all follow-up visits**
